# Supplementary material for: Dynamics and Predictors of Cognitive Impairment along the Disease Course in Multiple Sclerosis
Source: MDPI journal article supplement (doi:10.3390/jpm11111107), 2021-10-28
Supplement: s1 [file s1]

## Supplementary material

### *MRI acquisition parameters*

We collected two different datasets (n1= 118 and n2 = 94) with the following acquisition parameters of the 3D-MPRAGE and 3D-FLAIR sequences, respectively. A 3D-structural image (n1) was acquired with TR = 1800 ms; TE = 3.01 ms; TI = 900 ms; 240 sagittal slices with 0.94 mm isotropic voxel size and a 256 × 256 matrix size; and a 3D-FLAIR with TR = 5000 ms; TE = 304 ms; TI = 1800 ms; 192 sagittal slices with 0.94 mm isotropic voxel size and a 256 × 256 matrix size. The other MRI dataset (n2) was obtained from other 3D-structural images with TR = 1970 ms; TE = 2.41 ms; TI = 1050 ms; 208 sagittal slices with 0.9 mm isotropic voxel size and a 256 × 256 matrix size; and a 3D-T2 FLAIR with TR = 5000 ms; TE = 393 ms; TI = 1800 ms; 208 sagittal slices with 0.9 mm isotropic voxel size and a 256 × 256 matrix size.

**Table S1.** Use of disease modifying therapies at baseline.

|                                | <b>Patients using DMTs<br/>(n=111)</b> |
|--------------------------------|----------------------------------------|
| Moderate-efficacy DMTs, n (%): | 94 (85)                                |
| Teriflunomide                  | 4 (4)                                  |
| Interferon beta                | 68 (61)                                |
| Glatiramer acetate             | 19 (17)                                |
| Dimethyl fumarate              | 3 (3)                                  |
| High-efficacy DMTs, n (%):     | 17 (15)                                |
| Fingolimod                     | 7 (6)                                  |
| Alemtuzumab                    | 1 (1)                                  |
| Natalizumab                    | 9 (8)                                  |

DMTs: Disease Modifying Therapies.

**Table S2.** Cognitive changes throughout the disease course.

|                          | <b>n (n examinations)</b> | <b>β (95% CI)</b>      | <b>p value</b> |
|--------------------------|---------------------------|------------------------|----------------|
| Global cognition z-score | 212 (605)                 | -0.011 (-0.02 – 0.00)  | 0.058          |
| Verbal memory z-score    | 212 (605)                 | -0.027 (-0.05 – -0.01) | 0.007          |
| Visual memory z-score    | 212 (605)                 | -0.018 (-0.03 – 0.00)  | 0.031          |
| Attention-IPS z-score    | 212 (605)                 | 0.008 (-0.01 – 0.02)   | 0.345          |
| Semantic fluency z-score | 210 (600)                 | -0.014 (-0.03 – 0.00)  | 0.043          |

Beta coefficients and 95% confidence intervals (CI) from age at MS onset, educational level, and sex adjusted mixed-effect models. IPS: information processing speed.

**Table S3.** Cognitive changes at the different phases of MS.

| <b>Cognitive domains</b> | <b>0-5 years</b>          |                         |                | <b>5-15 years</b>         |                          |                | <b>15-30 years</b>        |                          |                |
|--------------------------|---------------------------|-------------------------|----------------|---------------------------|--------------------------|----------------|---------------------------|--------------------------|----------------|
|                          | <b>n (n examinations)</b> | <b>β (95% CI)</b>       | <b>p value</b> | <b>n (n examinations)</b> | <b>β (95% CI)</b>        | <b>p value</b> | <b>n (n examinations)</b> | <b>β (95% CI)</b>        | <b>p value</b> |
| Global cognition z-score | 89 (223)                  | 0.080<br>(0.04 – 0.12)  | <0.001         | 121 (241)                 | -0.029<br>(-0.05 – 0.01) | 0.013          | 66 (141)                  | -0.031<br>(-0.06 – 0.01) | 0.021          |
| Verbal memory z-score    | 89 (223)                  | 0.083<br>(0.01 – 0.16)  | 0.037          | 121 (241)                 | -0.041<br>(-0.08 – 0.00) | 0.047          | 66 (141)                  | -0.055<br>(-0.10 – 0.01) | 0.018          |
| Visual memory z-score    | 89 (223)                  | 0.061<br>(-0.01 – 0.13) | 0.092          | 121 (241)                 | -0.041<br>(-0.08 – 0.01) | 0.024          | 66 (141)                  | -0.018<br>(-0.06 – 0.02) | 0.359          |
| Attention-IPS z-score    | 89 (223)                  | 0.107<br>(0.05 – 0.16)  | <0.001         | 121 (241)                 | 0.003<br>(-0.03 – 0.03)  | 0.850          | 66 (141)                  | -0.035<br>(-0.07 – 0.00) | 0.055          |
| Semantic fluency z-score | 88 (221)                  | 0.035<br>(-0.03 – 0.09) | 0.265          | 121 (240)                 | -0.020<br>(-0.05 – 0.01) | 0.195          | 66 (139)                  | -0.028<br>(-0.06 – 0.01) | 0.106          |

Beta coefficients and 95% confidence intervals (CI) from age at MS onset, educational level, level, and sex adjusted spline models with knots at 5 and 15 years of disease duration. IPS: information processing speed.
